# Supplementary material for: Enrichment of Conserved Synaptic Activity-Responsive Element in Neuronal Genes Predicts a Coordinated Response of MEF2, CREB and SRF
Source: PLoS One. 2013 Jan 31;8(1):e53848. doi: 10.1371/journal.pone.0053848 (PMC3561385; doi:10.1371/journal.pone.0053848)
Supplement: Table S2 — Gene Ontology analysis of SARE-containing genes. GO analysis of all genes containing the SARE cluster performed by Toppfun application. Additional tab on table shows the 21 GO categories out of the total 112 enriched GO categories of biological functions related to nervous system and the same analysis performed on subsets of SARE containing genes grouped as intergenic (distant regulated genes) or intronic, promoter, CDS and utr (closely regulated genes). Most of the functions seem to be regulated by both distant and close SARE, but some of them are specific to each category (light shaded blue). (XLSX) [file pone.0053848.s002.xlsx]

## Sheet: GOCategories_AllSARE
1: GO: Molecular Function
	ID	Name		p-value		4: Human Phenotype							6: Domain
1	GO:0030528	transcription regulator activity		2.757e-18			ID	Name		p-value				ID	Name	Source	p-value
2	GO:0003700	sequence-specific DNA binding transcription factor activity		5.916e-17		1	HP:0000213	Thin lips		0.03436			1	IPR009057	Homeodomain-like	InterPro	5.738e-06
3	GO:0001071	nucleic acid binding transcription factor activity		6.275e-17									2	PS00027	HOMEOBOX_1	PROSITE	0.0001743
4	GO:0016564	transcription repressor activity		1.419e-15									3	SM00389	HOX	SMART	0.0001921
5	GO:0043565	sequence-specific DNA binding		3.768e-15		5: Mouse Phenotype							4	IPR001356	Homeobox	InterPro	0.0002115
6	GO:0016563	transcription activator activity		1.054e-10			ID	Name		p-value			5	PS50071	HOMEOBOX_2	PROSITE	0.0002115
7	GO:0003714	transcription corepressor activity		1.337e-09		1	MP:0001943	abnormal respiration		9.277e-06			6	PF00046	Homeobox	Pfam	0.0004557
8	GO:0003712	transcription cofactor activity		1.5e-09		2	MP:0011087	complete neonatal lethality		3.421e-05			7	G3DSA:1.10.10.60	Homeodomain-rel	Gene3D	0.003643
9	GO:0000989	transcription factor binding transcription factor activity		1.592e-09		3	MP:0002081	perinatal lethality		7.82e-05			8	IPR012287	Homeodomain-rel	InterPro	0.004237
10	GO:0000988	protein binding transcription factor activity		1.79e-09		4	MP:0003861	abnormal nervous system development		0.0001203			9	IPR017970	Homeobox_CS	InterPro	0.006808
11	GO:0004672	protein kinase activity		4.161e-09		5	MP:0002882	abnormal neuron morphology		0.0001362			10	PS51042	CUT	PROSITE	0.007416
12	GO:0003690	double-stranded DNA binding		1.18e-08		6	MP:0002058	neonatal lethality		0.0001544			11	PF02376	CUT	Pfam	0.007416
13	GO:0019904	protein domain specific binding		1.36e-08		7	MP:0000783	abnormal forebrain morphology		0.000538			12	IPR003350	Hmoeo_CUT	InterPro	0.007416
14	GO:0016773	phosphotransferase activity, alcohol group as acceptor		2.4e-08		8	MP:0009937	abnormal neuron differentiation		0.0005643			13	IPR003585	Neurexin-like	InterPro	0.03588
15	GO:0019199	transmembrane receptor protein kinase activity		3.614e-08		9	MP:0000778	abnormal nervous system tract morphology		0.0006232			14	SM00294	4.1m	SMART	0.03588
16	GO:0043566	structure-specific DNA binding		4.621e-08		10	MP:0000787	abnormal telencephalon morphology		0.0006525			15	IPR011009	Kinase-like_dom	InterPro	0.04824
						11	MP:0001575	cyanosis		0.001013
2: GO: Biological Process						12	MP:0001574	abnormal oxygen level		0.001868
	ID	Name		p-value		13	MP:0001953	respiratory failure		0.002057
1	GO:0048468	cell development		9.085e-15		14	MP:0003943	abnormal hepatobiliary system development		0.002934			7: Pathway
2	GO:0030182	neuron differentiation		1.758e-11		15	MP:0001951	abnormal breathing pattern		0.003888				ID	Name	Source	p-value
3	GO:0006357	regulation of transcription from RNA polymerase II promoter		2.998e-11		16	MP:0000438	abnormal cranium morphology		0.004954			1	REACTOME_ADHERENS_JUNCTIONS_INTERACTIONS	Genes involved in Adherens junctions interactions	MSigDB: C2.cp - Reactome	0.01969
4	GO:0048699	generation of neurons		1.519e-10		17	MP:0001961	abnormal reflex		0.005574
5	GO:0022008	neurogenesis		2.279e-10		18	MP:0005274	abnormal viscerocranium morphology		0.006088
6	GO:0048858	cell projection morphogenesis		7.172e-10		19	MP:0002116	abnormal craniofacial bone morphology		0.006864
7	GO:0006366	transcription from RNA polymerase II promoter		7.313e-10		20	MP:0002067	abnormal sensory capabilities/reflexes/nociception		0.00693
8	GO:0032990	cell part morphogenesis		1.158e-09		21	MP:0002133	abnormal respiratory system physiology		0.007804
9	GO:0048812	neuron projection morphogenesis		2.872e-09		22	MP:0002152	abnormal brain morphology		0.01106
10	GO:0007409	axonogenesis		3.401e-09		23	MP:0005388	respiratory system phenotype		0.01764
11	GO:0032989	cellular component morphogenesis		3.933e-09		24	MP:0002327	abnormal respiratory function		0.01834
12	GO:0000902	cell morphogenesis		5.851e-09		25	MP:0009944	abnormal olfactory lobe morphology		0.01954
13	GO:0048666	neuron development		6.425e-09		26	MP:0006009	abnormal neuronal migration		0.02121
14	GO:0010629	negative regulation of gene expression		9.711e-09		27	MP:0000104	abnormal sphenoid bone morphology		0.02396
15	GO:0016481	negative regulation of transcription		1.583e-08		28	MP:0002199	abnormal brain commissure morphology		0.03057
16	GO:0031175	neuron projection development		2.283e-08		29	MP:0000780	abnormal corpus callosum morphology		0.0325
17	GO:0045934	negative regulation of nucleobase-containing compound metabolic process		2.528e-08		30	MP:0001954	respiratory distress		0.03816
18	GO:0051172	negative regulation of nitrogen compound metabolic process		4.743e-08		31	MP:0003492	abnormal involuntary movement		0.0397
19	GO:0050793	regulation of developmental process		5.464e-08		32	MP:0009964	abnormal cerebellum lobule morphology		0.04158
20	GO:2000026	regulation of multicellular organismal development		6.5e-08
21	GO:0009888	tissue development		7.567e-08
22	GO:0045941	positive regulation of transcription		9.349e-08
23	GO:0048667	cell morphogenesis involved in neuron differentiation		1.058e-07
24	GO:0051239	regulation of multicellular organismal process		1.077e-07
25	GO:0010557	positive regulation of macromolecule biosynthetic process		1.481e-07
26	GO:0045935	positive regulation of nucleobase-containing compound metabolic process		2.269e-07
27	GO:0010628	positive regulation of gene expression		2.54e-07
28	GO:0007411	axon guidance		2.747e-07
29	GO:0030030	cell projection organization		2.882e-07
30	GO:0045595	regulation of cell differentiation		3.312e-07
31	GO:0007417	central nervous system development		3.493e-07
32	GO:0031327	negative regulation of cellular biosynthetic process		3.532e-07
33	GO:0051173	positive regulation of nitrogen compound metabolic process		3.924e-07
34	GO:0010558	negative regulation of macromolecule biosynthetic process		6.253e-07
35	GO:0009890	negative regulation of biosynthetic process		7.749e-07
36	GO:0010604	positive regulation of macromolecule metabolic process		1.093e-06
37	GO:0009887	organ morphogenesis		1.158e-06
38	GO:0000904	cell morphogenesis involved in differentiation		1.19e-06
39	GO:2000113	negative regulation of cellular macromolecule biosynthetic process		2.123e-06
40	GO:0045892	negative regulation of transcription, DNA-dependent		2.392e-06
41	GO:0010605	negative regulation of macromolecule metabolic process		3.351e-06
42	GO:0031328	positive regulation of cellular biosynthetic process		3.441e-06
43	GO:0051253	negative regulation of RNA metabolic process		3.85e-06
44	GO:0009891	positive regulation of biosynthetic process		3.974e-06
45	GO:0035295	tube development		9.035e-06
46	GO:0009892	negative regulation of metabolic process		1.298e-05
47	GO:0031324	negative regulation of cellular metabolic process		1.346e-05
48	GO:0060284	regulation of cell development		1.641e-05
49	GO:0043009	chordate embryonic development		2.202e-05
50	GO:0009792	embryo development ending in birth or egg hatching		3.715e-05
51	GO:0045944	positive regulation of transcription from RNA polymerase II promoter		4.308e-05
52	GO:0009893	positive regulation of metabolic process		4.934e-05
53	GO:0031325	positive regulation of cellular metabolic process		5.335e-05
54	GO:0045893	positive regulation of transcription, DNA-dependent		5.809e-05
55	GO:0050767	regulation of neurogenesis		8.079e-05
56	GO:0051254	positive regulation of RNA metabolic process		8.436e-05
57	GO:0007507	heart development		9.754e-05
58	GO:0045664	regulation of neuron differentiation		0.0001274
59	GO:0000122	negative regulation of transcription from RNA polymerase II promoter		0.0002477
60	GO:0060537	muscle tissue development		0.0002934
61	GO:0001501	skeletal system development		0.0003594
62	GO:0014706	striated muscle tissue development		0.0003723
63	GO:0007517	muscle organ development		0.0004268
64	GO:0051960	regulation of nervous system development		0.0004839
65	GO:0006935	chemotaxis		0.0005214
66	GO:0042330	taxis		0.0005214
67	GO:0008283	cell proliferation		0.0007791
68	GO:0009790	embryo development		0.0008305
69	GO:0010646	regulation of cell communication		0.0008727
70	GO:0040011	locomotion		0.0009185
71	GO:0060429	epithelium development		0.001003
72	GO:0042127	regulation of cell proliferation		0.001207
73	GO:0030900	forebrain development		0.001739
74	GO:0007420	brain development		0.001751
75	GO:0045137	development of primary sexual characteristics		0.001847
76	GO:0048608	reproductive structure development		0.002444
77	GO:0008406	gonad development		0.002544
78	GO:0072359	circulatory system development		0.002684
79	GO:0072358	cardiovascular system development		0.002684
80	GO:0061061	muscle structure development		0.003628
81	GO:0048646	anatomical structure formation involved in morphogenesis		0.004779
82	GO:0048598	embryonic morphogenesis		0.004862
83	GO:0021772	olfactory bulb development		0.005054
84	GO:0031290	retinal ganglion cell axon guidance		0.005459
85	GO:0048732	gland development		0.005488
86	GO:0010551	regulation of gene-specific transcription from RNA polymerase II promoter		0.006084
87	GO:0021889	olfactory bulb interneuron differentiation		0.006393
88	GO:0032569	gene-specific transcription from RNA polymerase II promoter		0.006493
89	GO:0044057	regulation of system process		0.006975
90	GO:0051094	positive regulation of developmental process		0.007017
91	GO:0021988	olfactory lobe development		0.007477
92	GO:0010648	negative regulation of cell communication		0.008275
93	GO:0007389	pattern specification process		0.008512
94	GO:0045597	positive regulation of cell differentiation		0.009075
95	GO:0002009	morphogenesis of an epithelium		0.01065
96	GO:0007423	sensory organ development		0.01287
97	GO:0021537	telencephalon development		0.01295
98	GO:0007548	sex differentiation		0.01363
99	GO:0048729	tissue morphogenesis		0.01457
100	GO:0008584	male gonad development		0.01511
101	GO:0009968	negative regulation of signal transduction		0.01635
102	GO:0023057	negative regulation of signaling		0.01834
103	GO:0051093	negative regulation of developmental process		0.0209
104	GO:0045778	positive regulation of ossification		0.02201
105	GO:0009966	regulation of signal transduction		0.02205
106	GO:0023051	regulation of signaling		0.02843
107	GO:0010594	regulation of endothelial cell migration		0.02953
108	GO:0032583	regulation of gene-specific transcription		0.03206
109	GO:0042692	muscle cell differentiation		0.03675
110	GO:0046546	development of primary male sexual characteristics		0.03699
111	GO:0001654	eye development		0.04498
112	GO:0021891	olfactory bulb interneuron development		0.0454
3: GO: Cellular Component
	ID	Name		p-value
1	GO:0045202	synapse		3.907e-07
2	GO:0044451	nucleoplasm part		3.436e-05
3	GO:0042734	presynaptic membrane		9.88e-05
4	GO:0043005	neuron projection		0.0003382
5	GO:0005654	nucleoplasm		0.0004763
6	GO:0044456	synapse part		0.0008778
7	GO:0042995	cell projection		0.003866
8	GO:0005667	transcription factor complex		0.007263
9	GO:0030424	axon		0.02232

## Sheet: Neural_BioGO
	Enrichment of neural GO Biological Process functions in subsets of SARE containing genes classified according to position of SARE cluster
							intergenic
								ID	name		p-value
							1	GO:0035295	tube development		3.271e-05
							12	GO:0030182	neuron differentiation		0.0007946
	All SARE cluster						14	GO:0048699	generation of neurons		0.0008444
	order	ID	name		p-value		16	GO:0007417	central nervous system development		0.001215
	2	GO:0030182	neuron differentiation		1.758e-11		20	GO:0022008	neurogenesis		0.001642
	4	GO:0048699	generation of neurons		1.519e-10		21	GO:0048812	neuron projection morphogenesis		0.001689
	5	GO:0022008	neurogenesis		2.279e-10		25	GO:0050767	regulation of neurogenesis		0.002655
	9	GO:0048812	neuron projection morphogenesis		2.872e-09		32	GO:0007409	axonogenesis		0.003188
	10	GO:0007409	axonogenesis		3.401e-09		35	GO:0051960	regulation of nervous system development		0.004894
	13	GO:0048666	neuron development		6.425e-09		36	GO:0021889	olfactory bulb interneuron differentiation		0.004924
	16	GO:0031175	neuron projection development		2.283e-11		42	GO:0045664	regulation of neuron differentiation		0.009826
	28	GO:0007411	axon guidance		2.747e-07		45	GO:0021772	olfactory bulb development		0.0136
	31	GO:0007417	central nervous system development		3.493e-07		46	GO:0048667	cell morphogenesis involved in neuron differentiation		0.01653
	45	GO:0035295	tube development		9.035e-06		49	GO:0021988	olfactory lobe development		0.01808
	58	GO:0045664	regulation of neuron differentiation		0.0001274		50	GO:0048666	neuron development		0.01976
	73	GO:0030900	forebrain development		0.001739		51	GO:0031175	neuron projection development		0.02243
	74	GO:0007420	brain development		0.001751		58	GO:0030900	forebrain development		0.03623
	83	GO:0021772	olfactory bulb development		0.005054
	84	GO:0031290	retinal ganglion cell axon guidance		0.005459
	87	GO:0021889	olfactory bulb interneuron differentiation		0.006393				intronic+promotor+utr+cds
	91	GO:0021988	olfactory lobe development		0.007477			ID	name		p-value
	96	GO:0007423	sensory organ development		0.01287		2	GO:0030182	neuron differentiation		6.328e-08
	97	GO:0021537	telencephalon development		0.01295		3	GO:0007411	axon guidance		4.114e-07
	111	GO:0001654	eye development		0.04498		5	GO:0022008	neurogenesis		7.891e-07
	112	GO:0021891	olfactory bulb interneuron development		0.0454		6	GO:0048699	generation of neurons		8.602e-07
							7	GO:0048666	neuron development		1.166e-06
							10	GO:0007409	axonogenesis		4.244e-06
							12	GO:0031175	neuron projection development		8.4e-06
							13	GO:0048812	neuron projection morphogenesis		9.563e-06
							18	GO:0048667	cell morphogenesis involved in neuron differentiation		3.676e-05
							32	GO:0007417	central nervous system development		0.0009052
							54	GO:0021602	cranial nerve morphogenesis		0.01457
							56	GO:0007423	sensory organ development		0.01613
							62	GO:0001654	eye development		0.03492
